# Supplementary material
Source: PubMed Central journal article supplement (PMC3463771)

**a**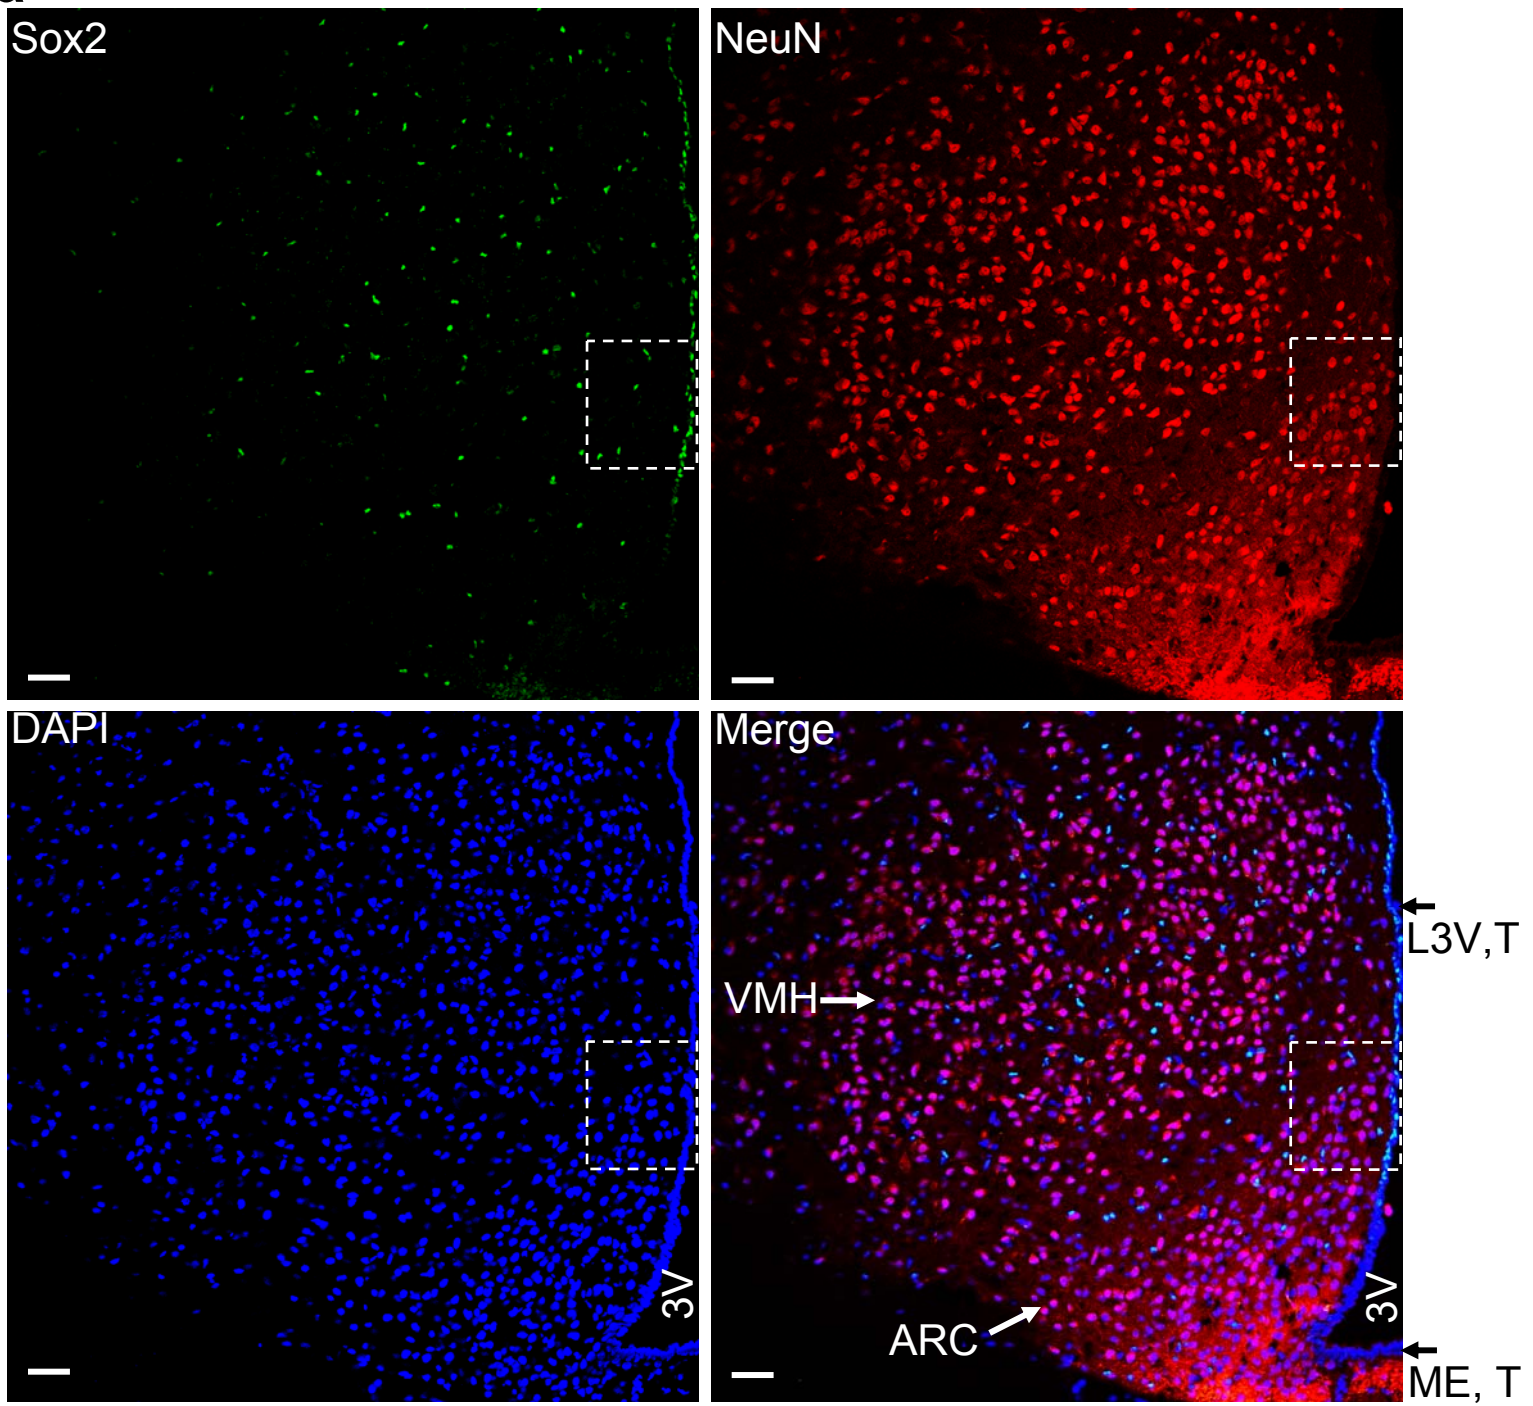**b**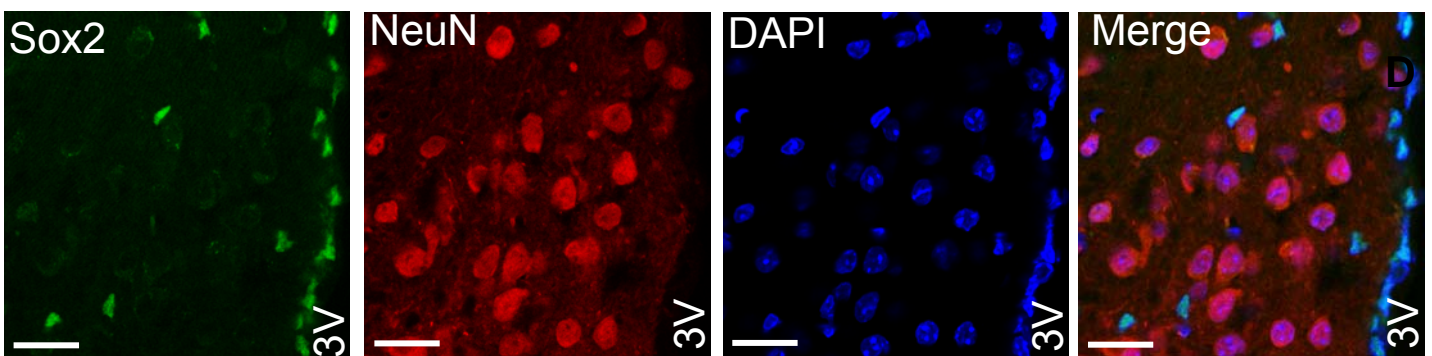

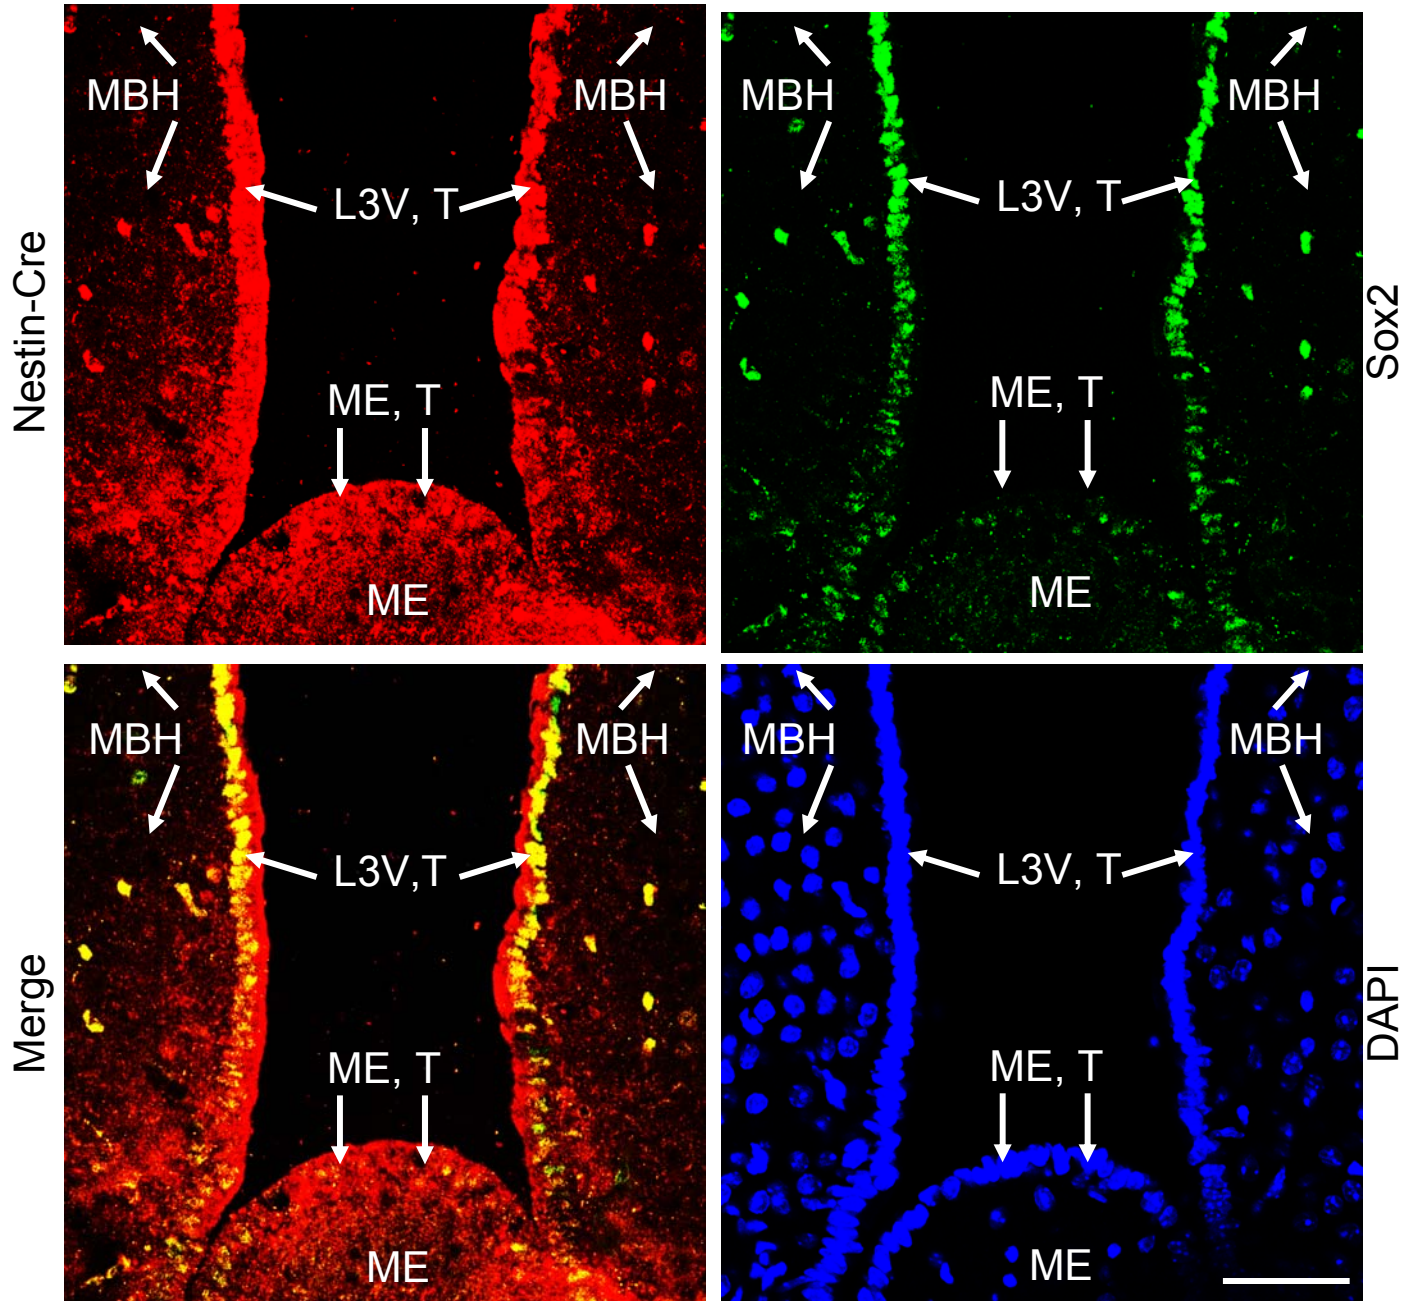



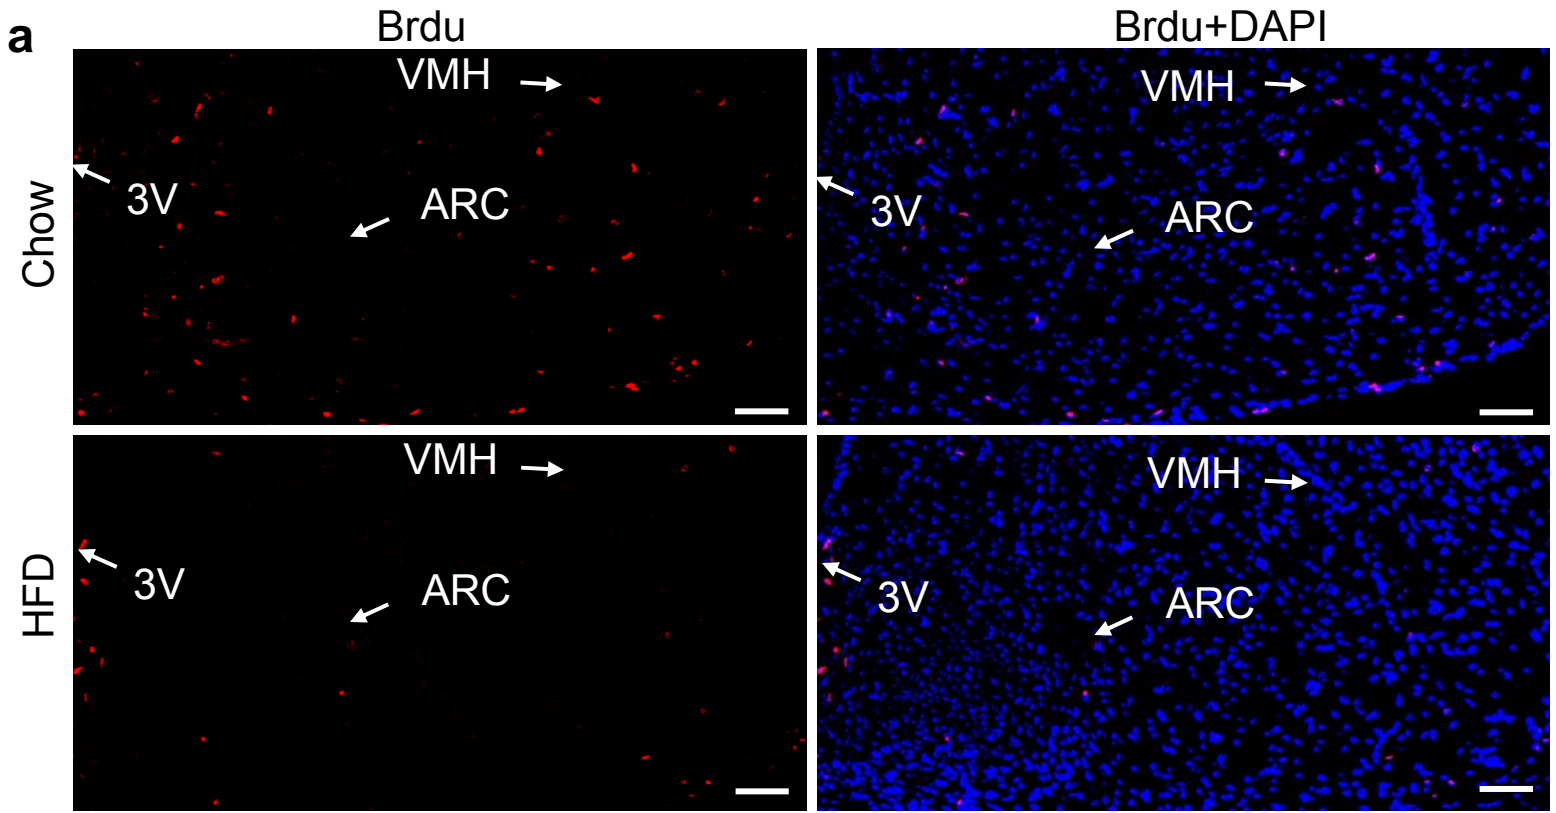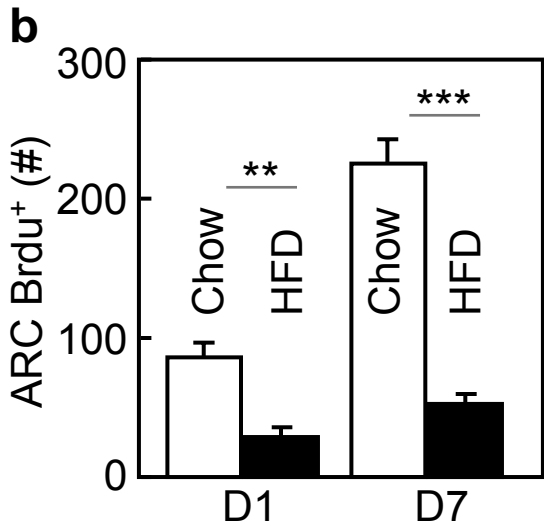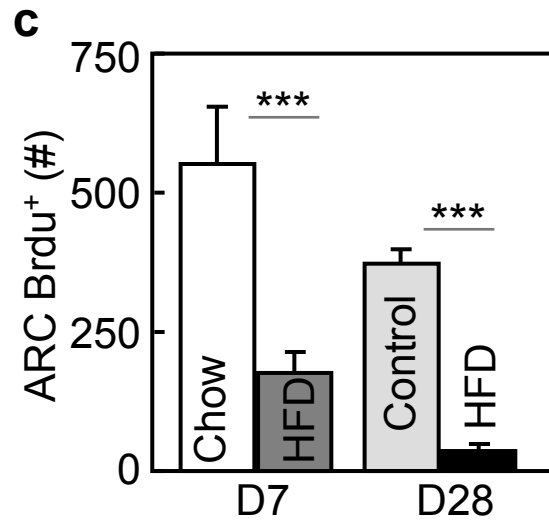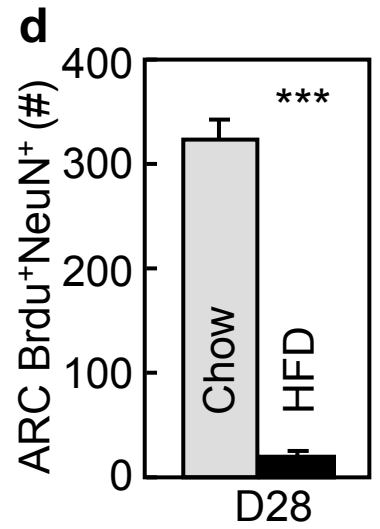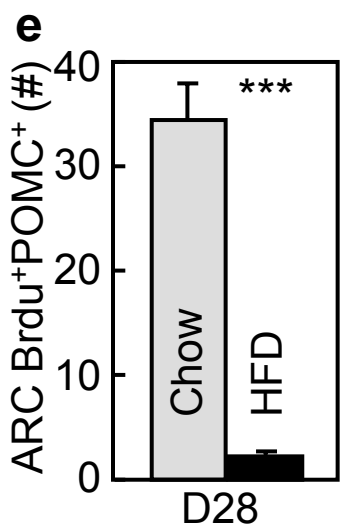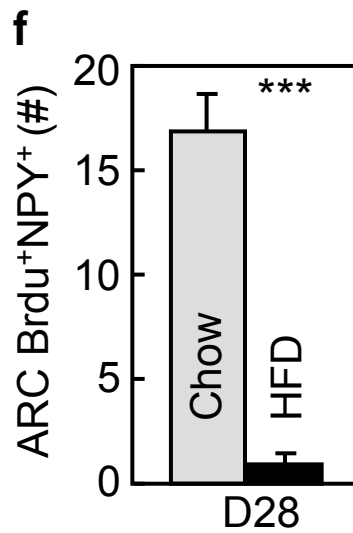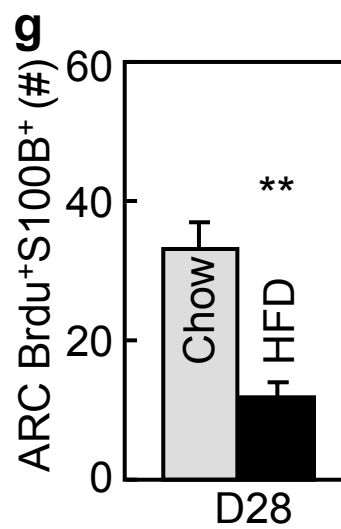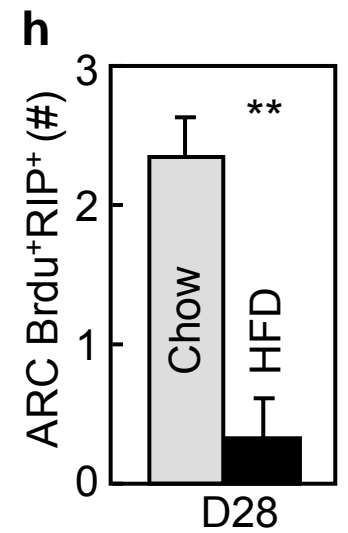

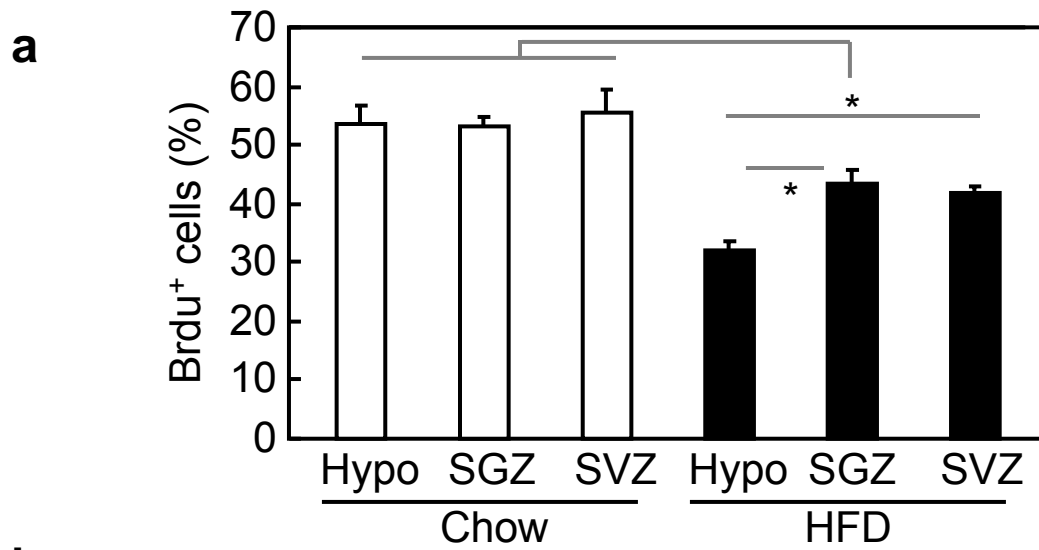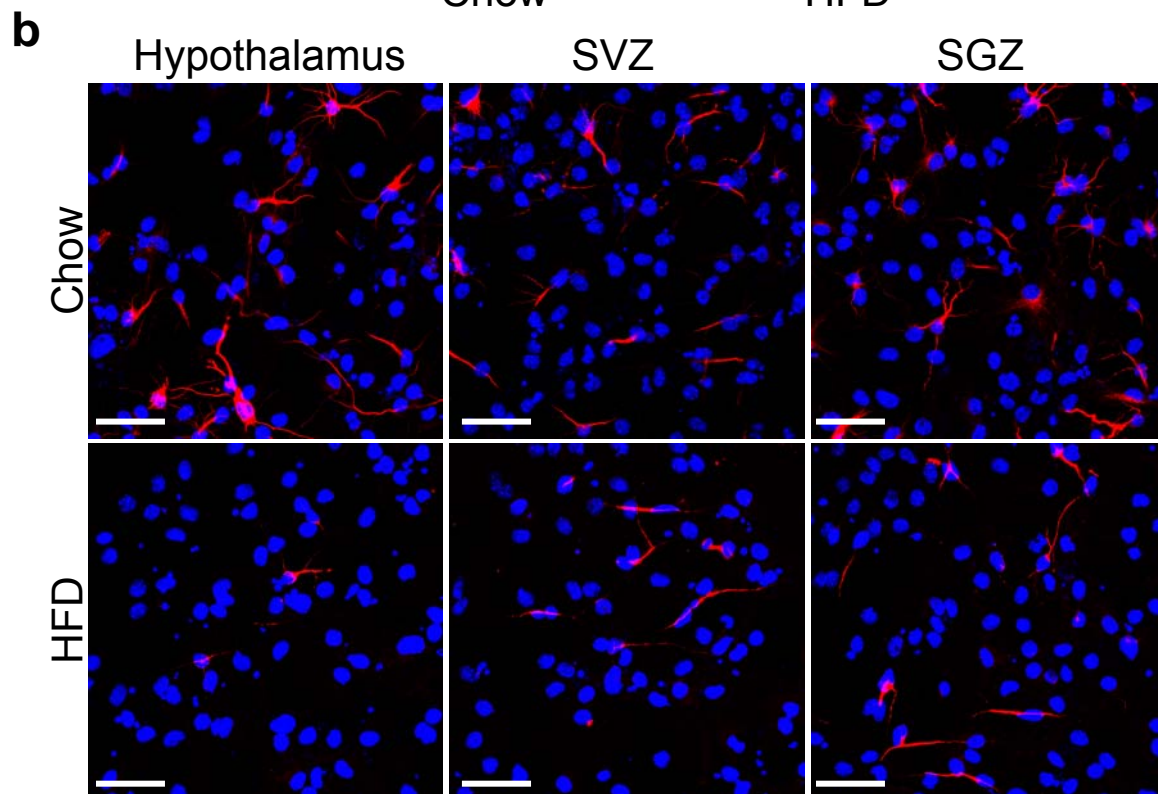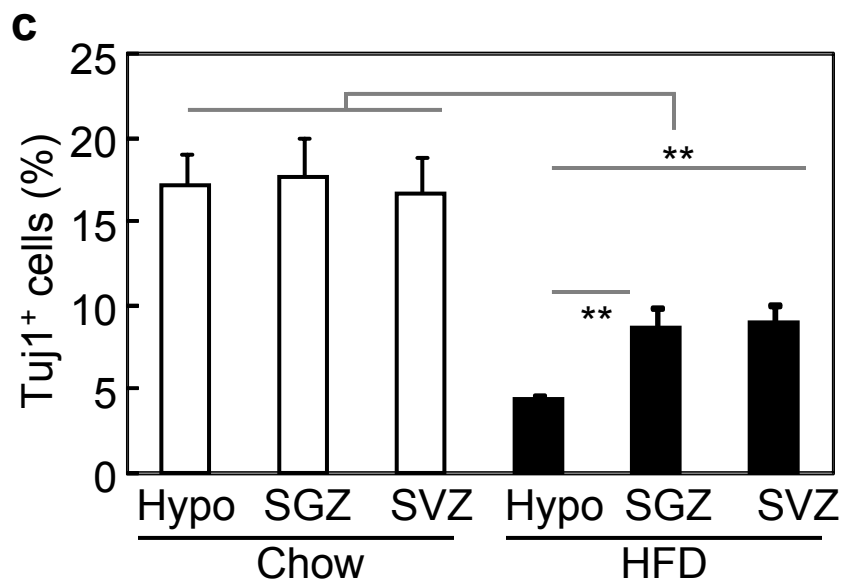

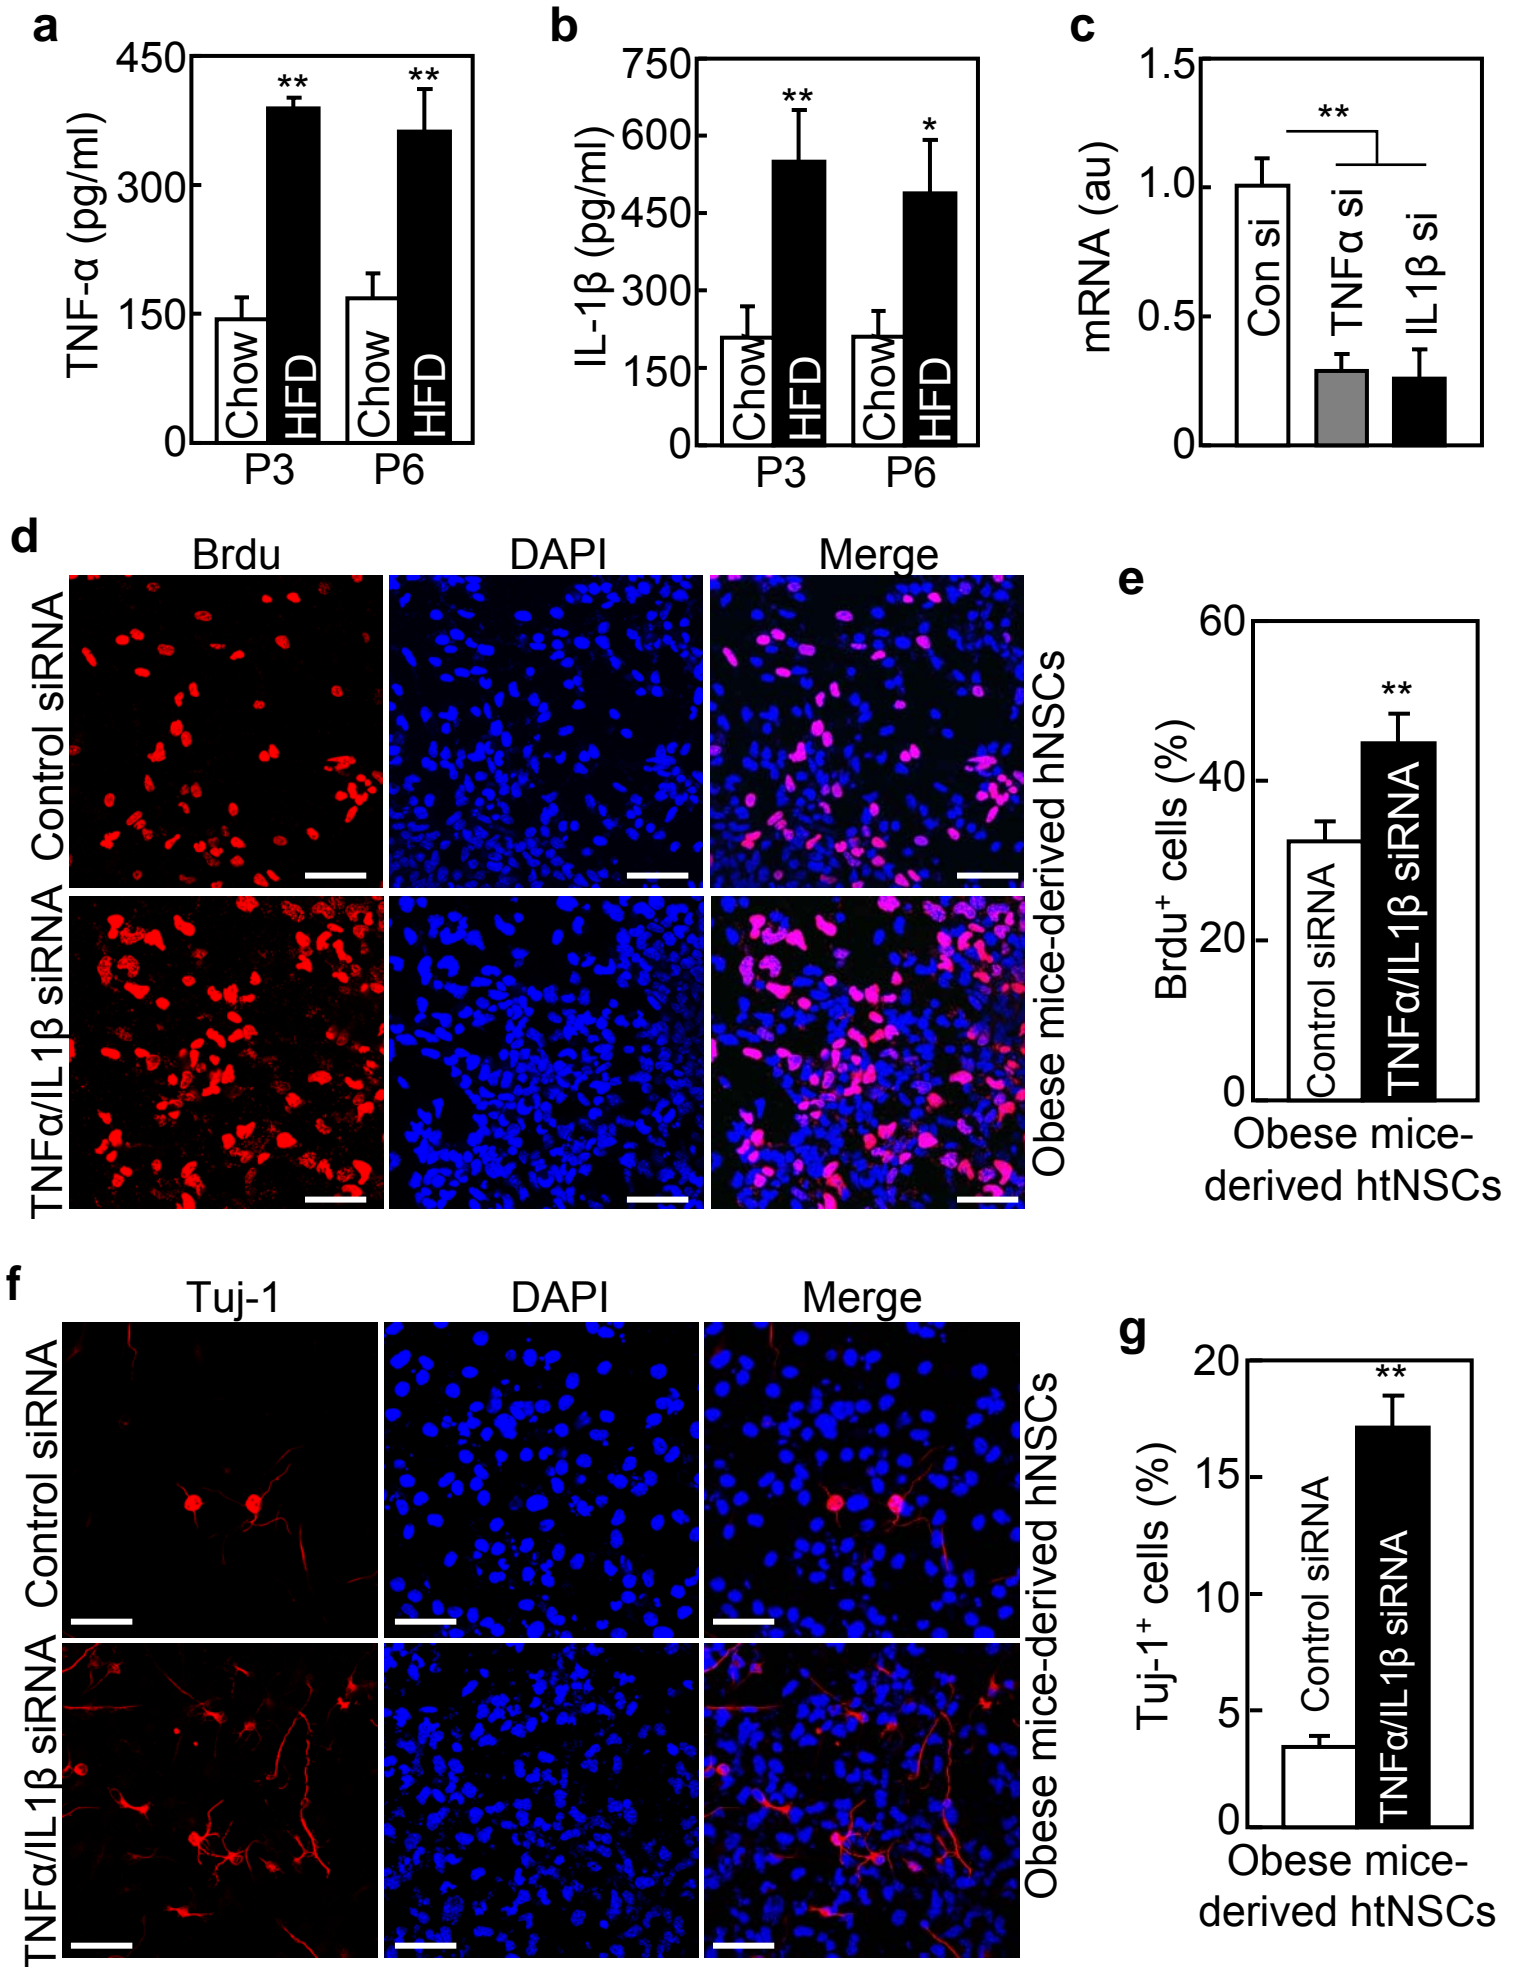



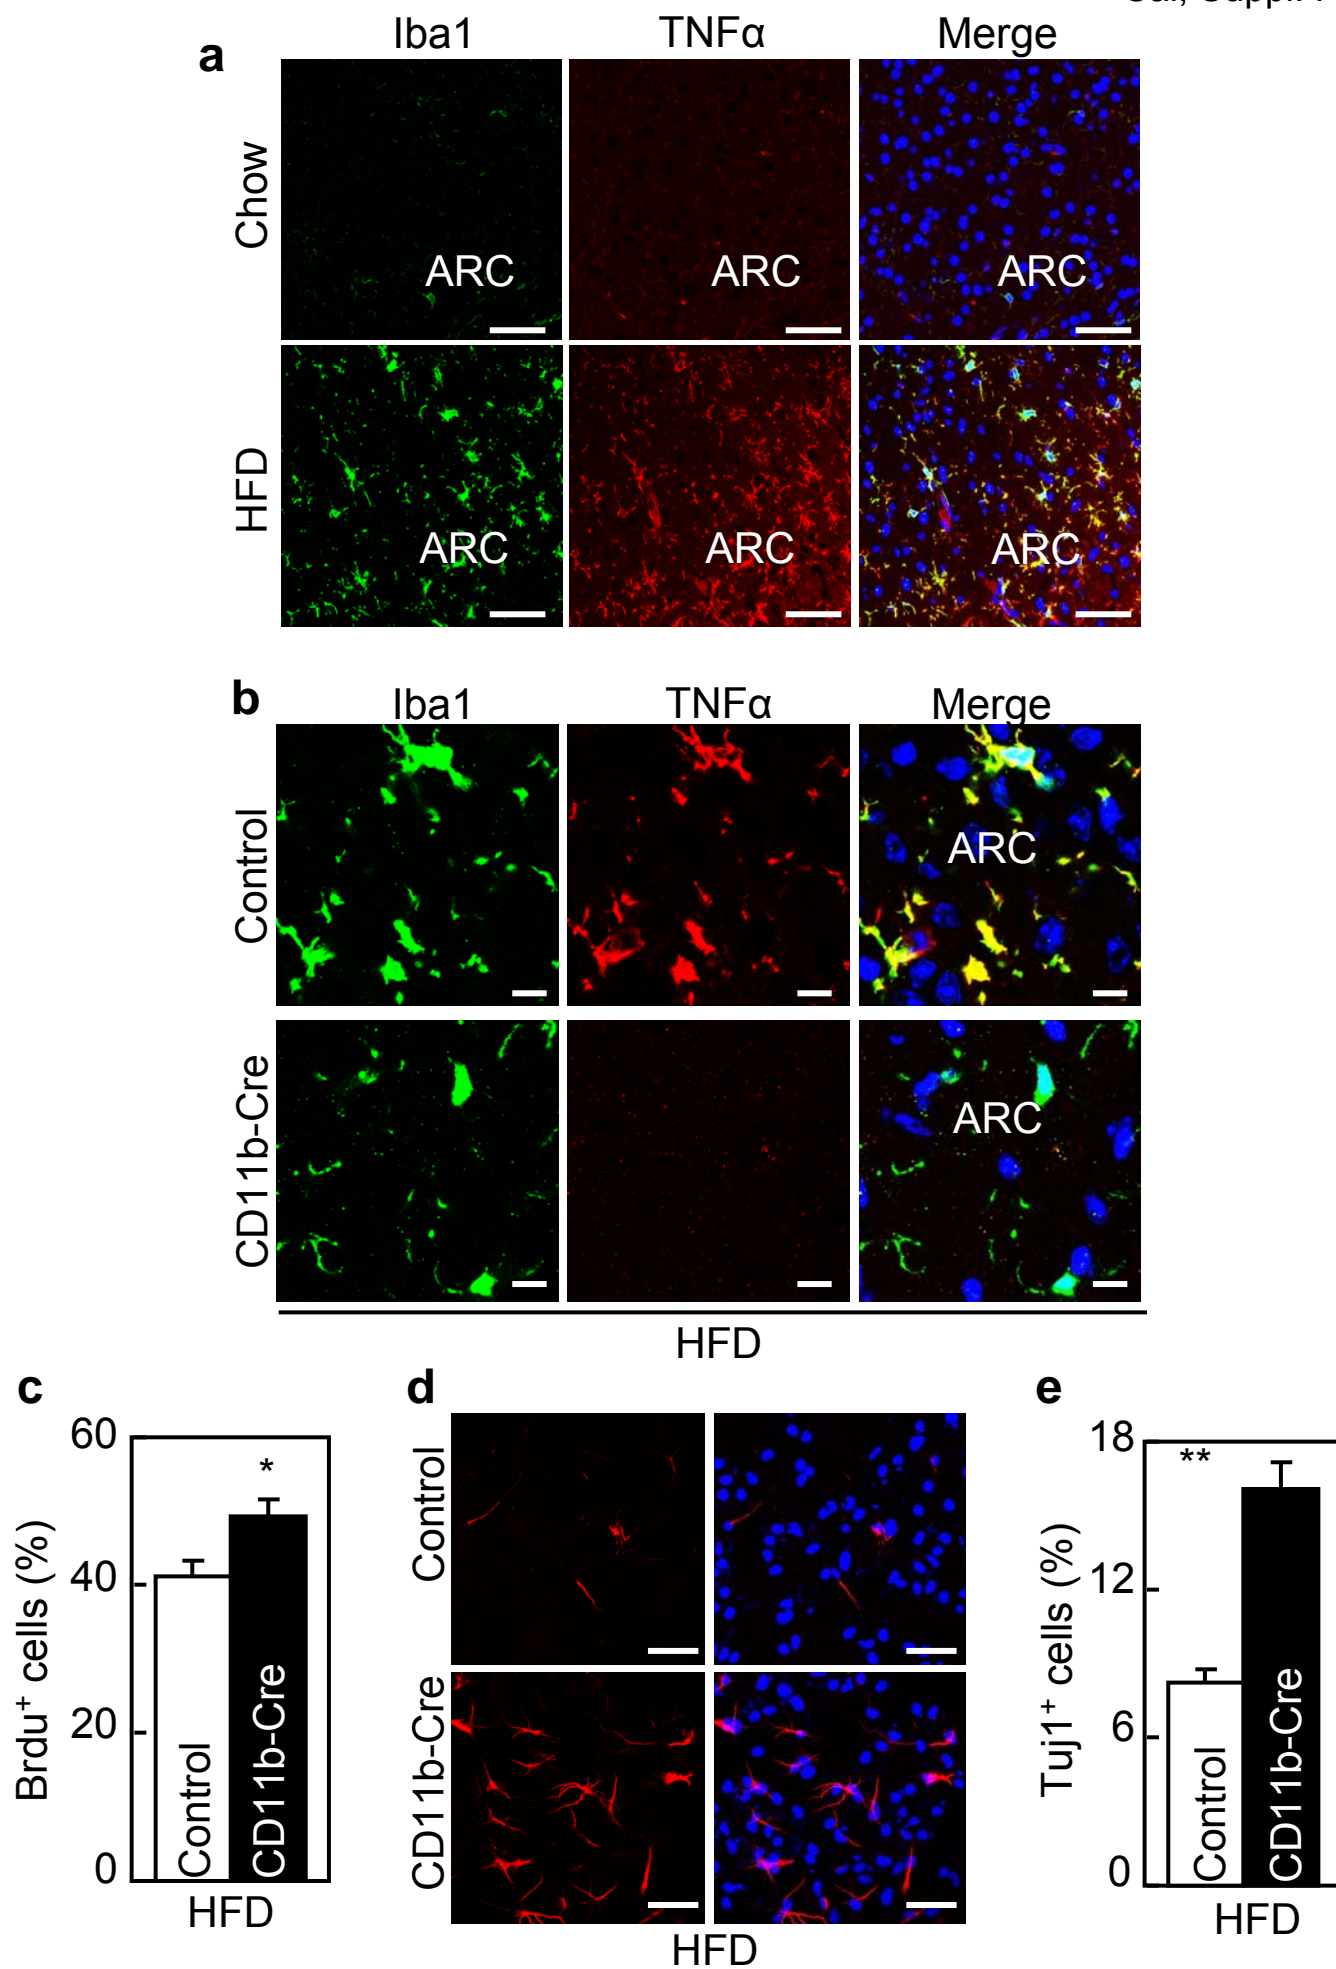

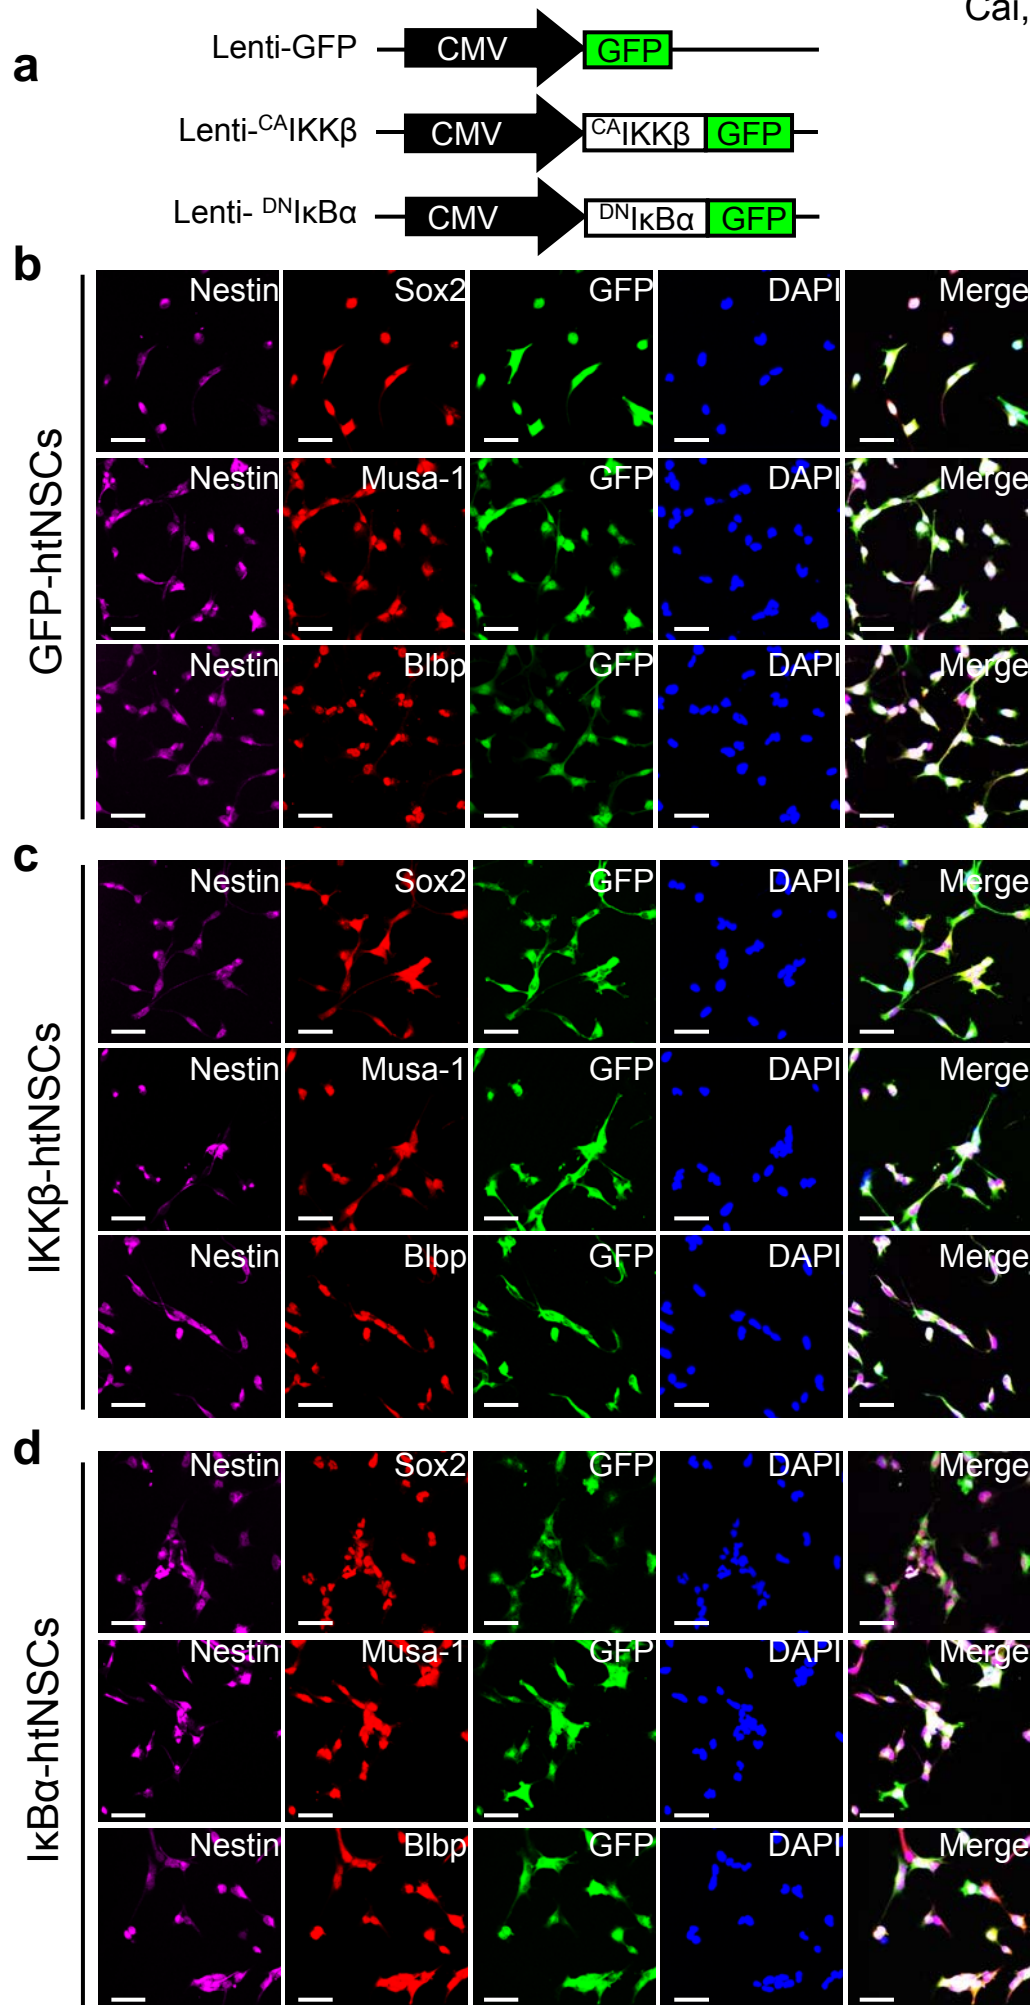

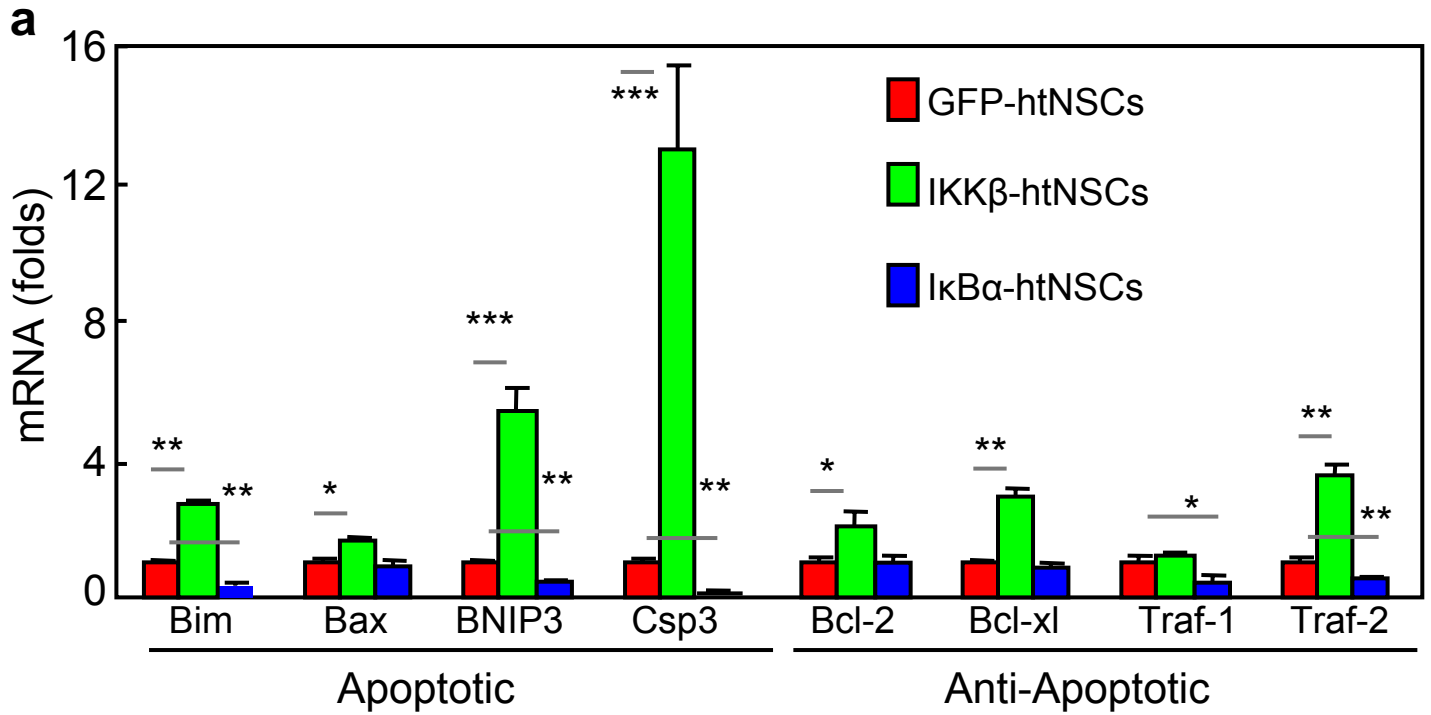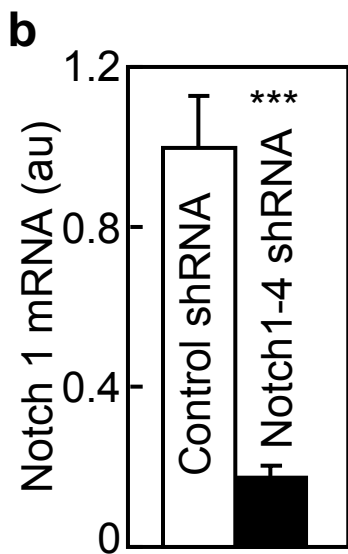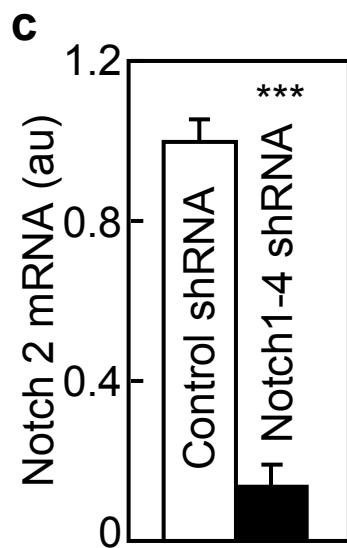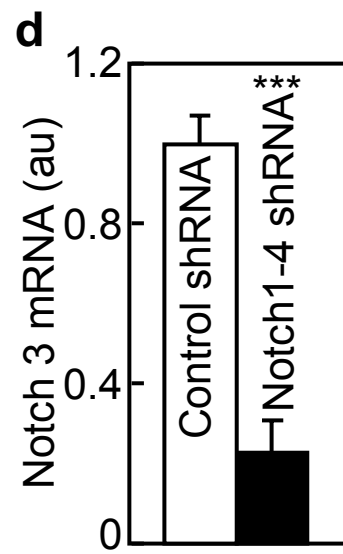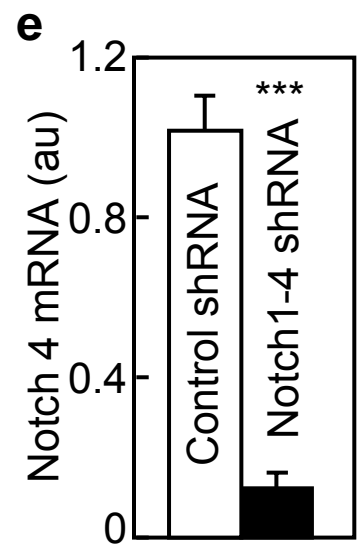



**SUPPLEMENTARY INFORMATION**

**Fig. 5a**

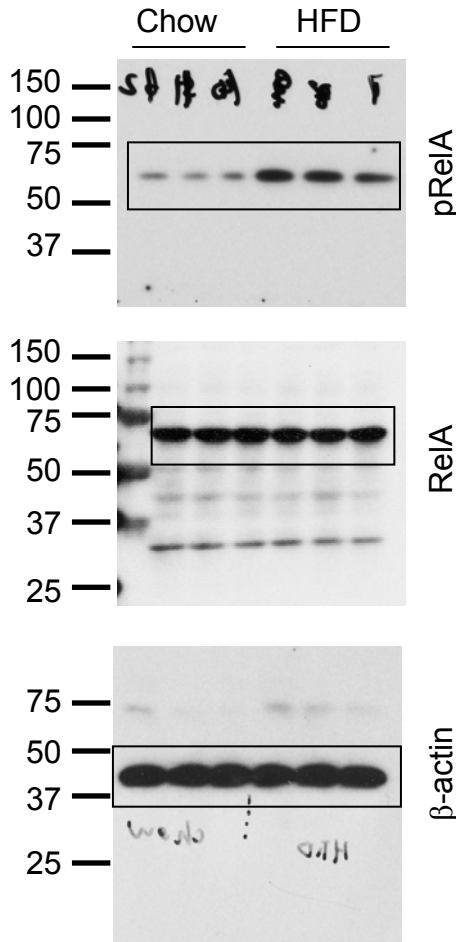

**Fig. 5b**

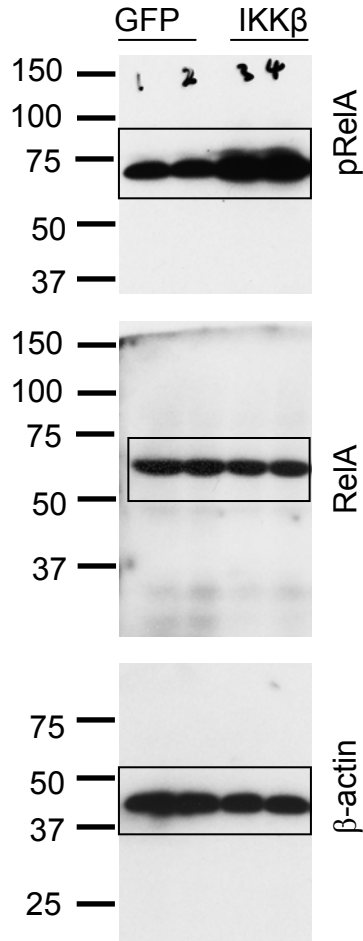

**Fig. 5c**

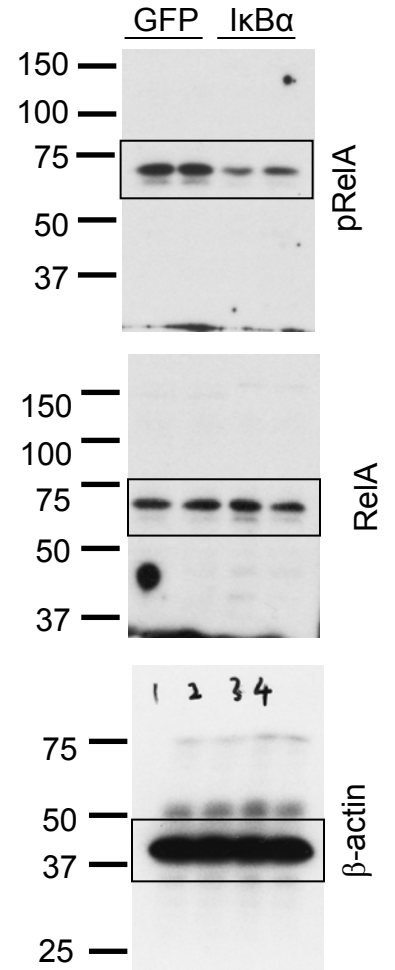

**Fig. 6e**

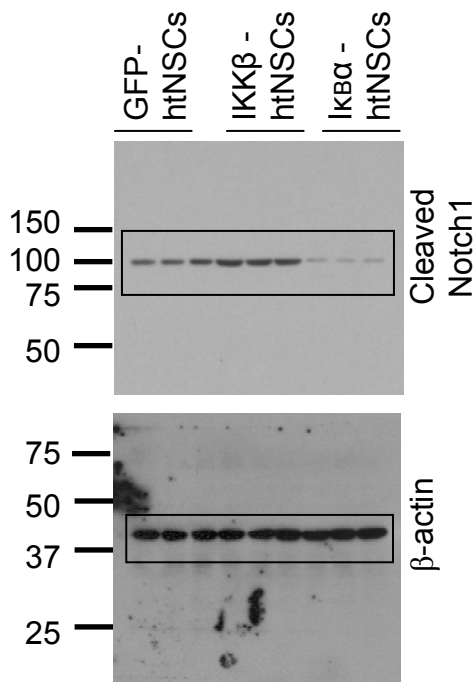

**Fig. 7c**

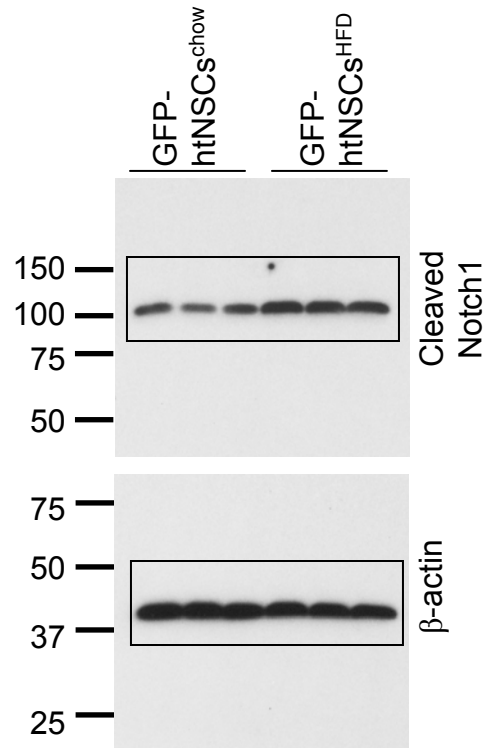

Supplement: NIHMS395502-supplement-2.pdf [file NIHMS395502-supplement-2.pdf]
